# Supplementary material for: TNP Analogues Inhibit the Virulence Promoting IP3-4 Kinase Arg1 in the Fungal Pathogen Cryptococcus neoformans
Source: MDPI journal article supplement (doi:10.3390/biom12101526), 2022-10-20
Supplement: s1 [file s1]

### General procedure I for the first nucleophilic aromatic substitution in the 6-position (2a and 2b) (Scheme 1)

To a solution of 6-chloro-2-fluoropurine (1 mmol, 1.00 equiv.) in *n*-butanol (4 mL), was added *N,N*-diisopropylethylamine (1.41 equiv.). The mixture was stirred at room temperature for 5 minutes. To the mixture, was added an amine (1.02 equiv.). The mixture was warmed to 65 °C and stirred for 4 hours. Then the reaction mixture was concentrated *in vacuo* and to the residue, was added cold water. The precipitate was filtered, washed with cold water and purified.

### General procedure II for the second nucleophilic aromatic substitution in the 2-position (9 to 29 (excluding 14 and 17), 32, 35, 38 and 39) (Scheme 1)

To a solution of a *N*6-substituted-2-fluoro-9*H*-purin-6-amine (1 mmol, 1.00 equiv.) in *n*-butanol (4 mL), was added *N,N*-diisopropylethylamine (2.20 equiv.). The mixture was stirred at room temperature for 5 minutes. To the mixture, was added an amine (2.00 equiv.). The mixture was heated to reflux and stirred overnight (16 hours). Then the reaction mixture was concentrated *in vacuo* and purified.

### General procedure III for the reductive amination in the 2-position (5a to 5c) (Scheme 2)

To a solution of 2-amino-6-chloropurine (1 mmol, 1.00 equiv.) in ethyl acetate (4 mL), was added a benzaldehyde (1.20 equiv.). The mixture was cooled to 0 °C and was added trifluoroacetic acid (2.24 equiv.) and sodium triacetoxyborohydride (1.50 equiv.). The reaction was warmed to room temperature and stirred overnight (16 hours). The mixture was quenched with 10% aq. NaOH solution (20 mL) to pH ~ 8-9 and extracted with ethyl acetate (3 x 20 mL). The organic extracts were combined, washed with brine (50 mL) and dried over MgSO<sub>4</sub>. Then it was concentrated *in vacuo* and purified.

### General procedure IV for the nucleophilic aromatic substitution in the 6-position (14, 30, 31, 36 and 41 to 44) (Scheme 2)

To a solution of *N*2-substituted-6-chloro-9*H*-purin-2-amine (1 mmol, 1.00 equiv.) in *n*-butanol (4 mL), was added an amine (1.50 equiv.) and triethylamine (1.00 equiv.). The reaction was heated to reflux and stirred for 5 hours. Then the reaction mixture was concentrated *in vacuo* and purified.

### *N*-Benzyl-2-fluoro-9*H*-purin-6-amine (2a) [39]

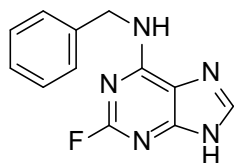

**General procedure I** – The crude precipitate was triturated with ethanol to give the title compound as a white powder (998 mg, 75% yield) after filtration.

**TLC:**  $R_f$  = 0.14 (1% 7 N  $\text{NH}_3$  in methanol, 40% ethyl acetate and 59% diethyl ether).

**$^1\text{H}$  NMR (401 MHz,  $\text{DMSO}-d_6$ )**  $\delta$  8.74 (br.s, 1H), 8.06 (s, 1H), 7.32 – 7.22 (m, 5H), 4.64 – 4.48 (m, 2H).  
Purine NH not observed.

**2-Fluoro-*N*-(2-methoxyethyl)-9*H*-purin-6-amine (2b) [39]**

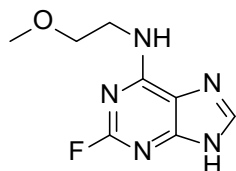

**General reaction procedure I** – The crude precipitate was recrystallised from isopropanol to give the title compound as a white powder (812 mg, 66% yield) after filtration.

**TLC:**  $R_f$  = 0.31 (2% 7 N  $\text{NH}_3$  in methanol, 6% methanol and 92% dichloromethane).

**$^1\text{H}$  NMR (401 MHz,  $\text{DMSO}-d_6$ )**  $\delta$  12.94 (s, 1H), 8.09 (s, 2H), 3.59 – 3.50 (m, 4H), 3.27 (s, 3H).

**$^{13}\text{C}$  NMR (101 MHz,  $\text{DMSO}-d_6$ )**  $\delta$  159.8 (C), 157.8 (C), 70.2 ( $\text{CH}_2$ ), 58.0 ( $\text{CH}_3$ ). Missing two quaternary carbons and one aromatic CH.

**HPLC:**  $t_R$  = 2.94 min, > 95% purity (214 and 254 nm).

**HRMS:** (ESI+) calc.  $m/z$  for  $[\text{C}_8\text{H}_{10}\text{N}_5\text{O} + \text{H}]^+$  212.0942, found: 212.0946.

**6-Chloro-*N*-(3-(trifluoromethyl)benzyl)-9*H*-purin-2-amine (5a) [28]**

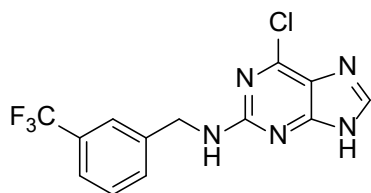

**General procedure III** – The concentrated residue was purified from ethanol recrystallisation and by column chromatography (20-70% ethyl acetate in dichloromethane) to give the title compound as a white powder (320 mg, 55% yield).

**TLC:**  $R_f$  = 0.33 (70% ethyl acetate in dichloromethane).

**$^1\text{H}$  NMR (401 MHz,  $\text{DMSO}-d_6$ )**  $\delta$  12.98 (br.s, 1H), 8.11 (s, 1H), 8.00 (br.s, 1H), 7.68 (app.s, 1H), 7.65 – 7.61 (m, 1H), 7.59 – 7.52 (m, 2H), 4.59 (d,  $J$  = 6.2 Hz, 2H).

**<sup>13</sup>C NMR (101 MHz, DMSO-*d*<sub>6</sub>)**  $\delta$  158.7 (C), 141.6 (C), 131.1 (CH), 129.3 (CH), 129.1 (C), 128.8 (C), 125.6 (C), 123.5 (d, *J* = 3.9 Hz, CH), 123.3 (d, *J* = 3.7 Hz, CH), 122.9 (C), 44.1 (CH<sub>2</sub>). One quaternary carbon and one aromatic CH was not observed.

**HPLC:** *t<sub>R</sub>* = 5.01 min, > 97% purity (214 and 254 nm).

**HRMS:** (ESI+) calc. *m/z* for [C<sub>13</sub>H<sub>9</sub><sup>35</sup>ClF<sub>3</sub>N<sub>5</sub> + H]<sup>+</sup> 328.0571, found: 328.058.

### ***N*-(3-Bromobenzyl)-6-chloro-9*H*-purin-2-amine (5b)**

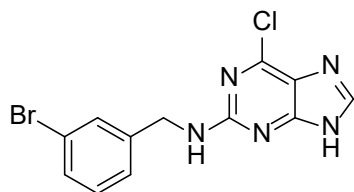

**General procedure III** – The concentrated residue was purified from ethanol recrystallisation and by column chromatography (2% 7 N NH<sub>3</sub> in methanol, 2% methanol and 96% dichloromethane) to give the title compound as a white powder (503 mg, 50% yield).

**TLC:** *R<sub>f</sub>* = 0.30 (2% 7 N NH<sub>3</sub> in methanol, 2% methanol, 36% ethyl acetate and 60% dichloromethane).

**<sup>1</sup>H NMR (401 MHz, DMSO-*d*<sub>6</sub>)**  $\delta$  12.98 (br.s, 1H), 8.11 (s, 1H), 7.94 (br.s, 1H), 7.51 (t, *J* = 1.8 Hz, 1H), 7.41 (ddd, *J* = 7.8, 2.1, 1.3 Hz, 1H), 7.33 (dt, *J* = 7.7, 1.4 Hz, 1H), 7.26 (t, *J* = 7.7 Hz, 1H), 4.50 (d, *J* = 6.3 Hz, 2H).

**<sup>13</sup>C NMR (101 MHz, DMSO-*d*<sub>6</sub>)**  $\delta$  158.7 (C), 143.1 (C), 130.4 (CH), 129.6 (CH), 129.4 (CH), 126.0 (CH), 121.6 (C), 43.9 (CH<sub>2</sub>). Three quaternary carbons and one aromatic CH was not observed.

**HPLC:** *t<sub>R</sub>* = 4.95 min, > 96% purity (214 and 254 nm).

**HRMS:** (ESI+) calc. *m/z* for [C<sub>12</sub>H<sub>9</sub><sup>79</sup>Br<sup>35</sup>ClN<sub>5</sub> + H]<sup>+</sup> 337.9803, found: 337.9806.

### **3-(((6-Chloro-9*H*-purin-2-yl)amino)methyl)phenol (5c)**

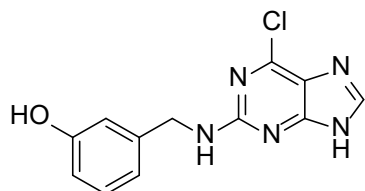

**General procedure III** – The concentrated residue was purified by column chromatography (1% 7 N NH<sub>3</sub> in methanol, 5% methanol and 94% dichloromethane) to give the title compound as a beige powder (105 mg, 64% yield).

**TLC:**  $R_f$  = 0.20 (1% 7 N  $\text{NH}_3$  in methanol, 5% methanol and 94% dichloromethane).

**$^1\text{H}$  NMR (401 MHz,  $\text{DMSO}-d_6$ )**  $\delta$  12.85 (br.s, 1H), 9.26 (br.s, 1H), 8.09 (s, 1H), 7.87 (br.s, 1H), 7.07 (t,  $J$  = 7.7 Hz, 1H), 6.75 – 6.70 (m, 2H), 6.58 (dd,  $J$  = 8.0, 2.4 Hz, 1H), 4.42 (d,  $J$  = 6.3 Hz, 2H).

**$^{13}\text{C}$  NMR (101 MHz,  $\text{DMSO}-d_6$ )**  $\delta$  158.9 (C), 157.3 (C), 141.8 (CH), 141.6 (C), 129.1 (CH), 117.4 (CH), 113.6 (CH), 113.4 (CH), 44.3 ( $\text{CH}_2$ ). Three quaternary carbons not observed.

**HPLC:**  $t_R$  = 3.47 min, > 95% purity (214 and 254 nm).

**HRMS:** (ESI+) calc.  $m/z$  for  $[\text{C}_{12}\text{H}_{10}^{35}\text{ClN}_5\text{O} + \text{H}]^+$  276.0647, found 276.0655.

**$N^6$ -Benzyl- $N^2$ -(3-(trifluoromethyl)benzyl)-9H-purine-2,6-diamine (9) [1,3]**

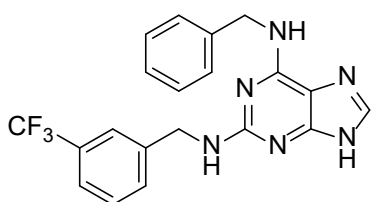

**Method 1: General reaction procedure II from 2a** – To the concentrated residue, was added cold diethyl ether and the title compound was collected as a white powder (12 mg, 30% yield) after filtration.

**Method 2: General reaction procedure IV from 5a** – To the concentrated residue was added cold dichloromethane. The precipitate was collected and was then washed with 0.5 M HCl followed by 30% ammonia solution. The title compound was collected as a white powder (60 mg, 70% yield).

**TLC:**  $R_f$  = 0.27 (1% 7 N  $\text{NH}_3$  in methanol, 40% ethyl acetate and 59% diethyl ether).

**$^1\text{H}$  NMR (401 MHz,  $\text{CD}_3\text{OD}$ )**  $\delta$  12.18 (br.s, 1H), 7.75 (br.s, 1H), 7.66 – 7.63 (m, 2H), 7.58 – 7.53 (m, 2H), 7.49 – 7.46 (m, 1H), 7.28 – 7.16 (m, 5H), 6.97 – 6.94 (m, 1H), 4.59 (app.br.s, 2H), 4.51 (d,  $J$  = 6.3 Hz, 2H).

**$^{13}\text{C}$  NMR (101 MHz,  $\text{CD}_3\text{OD}$ )**  $\delta$  159.1 (C), 143.2 (C), 140.6 (C), 131.1 (CH), 129.0 (CH), 128.9 (C), 128.6 (C), 128.1 (CH), 127.4 (CH), 126.5 (CH), 125.8 (C), 123.4 (CH,  $q$ ,  $J$  = 3.8 Hz), 123.1 (C), 123.0 (CH,  $q$ ,  $J$  = 3.5 Hz), 44.1 ( $\text{CH}_2$ ). One quaternary carbon and one aromatic CH not observed.

**HPLC:**  $t_R$  = 5.37 min, > 95% purity (214 and 254 nm).

**HRMS:** (ESI+) calc.  $m/z$  for  $[\text{C}_{20}\text{H}_{17}\text{F}_3\text{N}_6 + \text{H}]^+$  399.1540, found 399.1551.

**$N^6$ -Benzyl- $N^2$ -(3-(difluoromethoxy)benzyl)-9H-purine-2,6-diamine (10)**

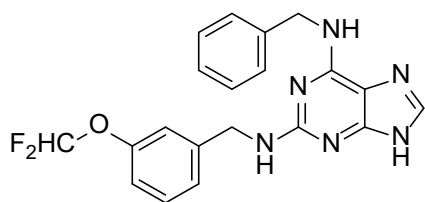

**General reaction procedure II from 2a** – To the concentrated residue, was added cold diethyl ether. The precipitate was filtered and washed with cold diethyl ether. It was then purified by column chromatography (20% ethyl acetate in diethyl ether) to give the title compound as a light-yellow powder (51 mg, 63% yield).

**TLC:**  $R_f$  = 0.24 (1% 7 N  $\text{NH}_3$  in methanol, 40% ethyl acetate and 59% diethyl ether).

**$^1\text{H}$  NMR (401 MHz,  $\text{CDCl}_3$  + a drop of  $\text{CD}_3\text{OD}$ )**  $\delta$  7.49 (s, 1H), 7.30 – 7.19 (m, 6H), 7.15 – 7.12 (m, 1H), 7.07 (t,  $J$  = 2.0 Hz, 1H), 6.95 (dd,  $J$  = 8.1, 2.6 Hz, 1H), 6.43 (t,  $J$  = 74.1 Hz, 1H), 4.68 (br.s, 2H), 4.56 – 4.55 (m, 2H).

**$^{13}\text{C}$  NMR (101 MHz,  $\text{CDCl}_3$  + a drop of  $\text{CD}_3\text{OD}$ )**  $\delta$  152.2 (C), 151.4 (C), 140.1 (C), 130.1 (CH), 128.7 (CH), 127.7 (CH), 127.2 (CH), 124.1 (CH), 118.3 (CH), 118.2 (C), 44.9 ( $\text{CH}_2$ ). Three quaternary carbons, two aromatic CH and O- $\text{CHF}_2$  not observed.

**HPLC:**  $t_R$  = 5.15 min, > 95% purity (214 and 254 nm).

**HRMS:** (ESI+) calc.  $m/z$  for  $[\text{C}_{20}\text{H}_{18}\text{F}_2\text{N}_6\text{O} + \text{H}]^+$  397.1583, found 397.1598.

#### **$N^6$ -Benzyl- $N^2$ -(3-methylbenzyl)-9H-purine-2,6-diamine (11)**

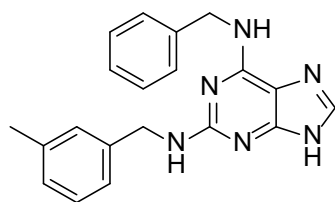

**General reaction procedure II from 2a** – To the concentrated residue, was added cold diethyl ether and the title compound was collected as a white powder (5.2 mg, 6.1% yield) after filtration.

**TLC:**  $R_f$  = 0.21 (1% 7 N  $\text{NH}_3$  in methanol, 40% ethyl acetate and 59% diethyl ether).

**$^1\text{H}$  NMR (401 MHz,  $\text{CDCl}_3$  + a drop of  $\text{CD}_3\text{OD}$ )**  $\delta$  7.35 – 7.26 (m, 5H), 7.24 – 7.15 (m, 2H), 7.13 – 7.10 (m, 2H), 7.05 (d,  $J$  = 7.5 Hz, 1H), 4.72 (s, 2H), 4.59 – 4.55 (m, 2H), 2.30 (s, 3H).

**<sup>13</sup>C NMR (101 MHz, CDCl<sub>3</sub> + a drop of CD<sub>3</sub>OD)** δ 139.5 (C), 138.8 (C), 138.1 (C), 128.5 (CH), 128.4 (CH), 128.1 (CH), 127.8 (CH), 127.6 (CH), 127.2 (CH), 124.4 (CH), 45.7 (CH<sub>2</sub>), 21.3 (CH<sub>3</sub>). Four quaternary carbons and one aromatic CH not observed.

**HPLC:** *t<sub>R</sub>* = 5.20 min, > 95% purity (214 and 254 nm).

**HRMS:** (ESI+) calc. *m/z* for [C<sub>19</sub>H<sub>19</sub>N<sub>7</sub> + H]<sup>+</sup> 345.1822, found 345.1831.

***N*<sup>6</sup>-Benzyl-*N*<sup>2</sup>-(3-(trifluoromethoxy)benzyl)-9*H*-purine-2,6-diamine (12)**

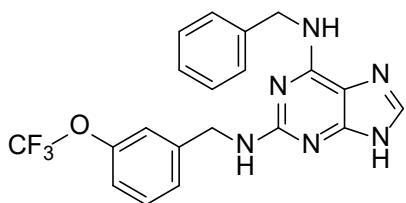

**General reaction procedure II from 2a** – To the concentrated residue, was added dichloromethane and petroleum ether. The precipitate was collected and was then washed with 0.5 M HCl followed by 30% ammonia solution. The title compound was collected as a white powder (19 mg, 19% yield).

**TLC:** *R<sub>f</sub>* = 0.17 (1% 7 N NH<sub>3</sub> in methanol and 99% dichloromethane).

**<sup>1</sup>H NMR (401 MHz, DMSO-*d*<sub>6</sub>)** δ 12.18 (br.s, 1H), 7.78 (br.s, 1H), 7.65 (s, 1H), 7.38 (t, *J* = 7.9 Hz, 1H), 7.30 – 7.28 (m, 3H), 7.26 – 7.24 (m, 3H), 7.19 – 7.15 (m, 2H), 6.94 – 6.91 (m, 1H), 4.59 (br.s, 2H), 4.47 (d, *J* = 6.4 Hz, 2H).

**<sup>13</sup>C NMR (101 MHz, DMSO-*d*<sub>6</sub>)** δ 159.1 (C), 148.4 (C), 144.7 (C), 129.9 (CH), 128.0 (CH), 127.4 (CH), 126.4 (CH), 126.0 (CH), 121.4 (C), 119.2 (CH), 118.8 (C), 118.6 (CH), 44.0 (CH<sub>2</sub>). Three quaternary carbons and one aromatic CH not observed.

**HPLC:** *t<sub>R</sub>* = 5.45 min, > 93% purity (214 and 254 nm).

**HRMS:** (ESI+) calc. *m/z* for [C<sub>20</sub>H<sub>17</sub>N<sub>6</sub>O + H]<sup>+</sup> 415.1489, found 415.1496.

***N*<sup>6</sup>-Benzyl-*N*<sup>2</sup>-(3-methoxybenzyl)-9*H*-purine-2,6-diamine (13)**

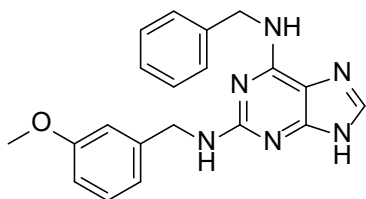

**General reaction procedure II from 2a** – To the concentrated residue, was added cold diethyl ether. The precipitate was filtered and washed with cold diethyl ether. It was then purified by column

chromatography (2% 7 N NH<sub>3</sub> in methanol, 2% methanol and 96% diethyl ether) to give the title compound as a white powder (8.3 mg, 11% yield).

**TLC:** *R<sub>f</sub>* = 0.17 (1% 7 N NH<sub>3</sub> in methanol, 40% ethyl acetate and 59% diethyl ether).

**<sup>1</sup>H NMR (401 MHz, DMSO-*d*<sub>6</sub>)**  $\delta$  12.16 (br.s, 1H), 7.73 (br.s, 1H), 7.64 (s, 1H), 7.32 (d, *J* = 7.5 Hz, 2H), 7.25 (t, *J* = 7.4 Hz, 2H), 7.20 – 7.14 (m, 2H), 6.88 – 6.85 (m, 2H), 6.79 – 6.72 (m, 2H), 4.62 (br.s, 2H), 4.42 (d, *J* = 6.3 Hz, 2H), 3.69 (s, 3H).

**<sup>13</sup>C NMR (101 MHz, DMSO-*d*<sub>6</sub>)**  $\delta$  159.3 (C), 159.2 (C), 143.2 (C), 140.7 (C), 135.2 (CH), 129.0 (CH), 128.0 (CH), 127.4 (CH), 126.4 (CH), 119.2 (CH), 112.7 (CH), 111.4 (CH), 54.9 (CH<sub>3</sub>), 44.4 (CH<sub>2</sub>). Three quaternary carbons and one aliphatic CH<sub>2</sub> not observed.

**HPLC:** *t<sub>R</sub>* = 4.95 min, > 95% purity (214 and 254 nm).

**HRMS:** (ESI+) calc. *m/z* for [C<sub>19</sub>H<sub>19</sub>N<sub>7</sub> + H]<sup>+</sup> 361.1771, found 361.1772.

***N*<sup>6</sup>-Benzyl-*N*<sup>2</sup>-(3-bromobenzyl)-9*H*-purine-2,6-diamine (14)**

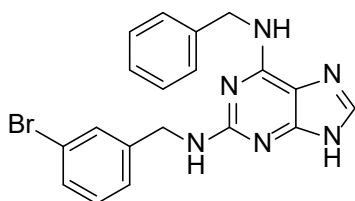

**General procedure IV from 5b** – The concentrated residue was added cold dichloromethane. The precipitate was collected and was then washed with 1 M HCl followed by 30% ammonia solution. The title compound was collected as a beige powder (107 mg, 89% yield).

**TLC:** *R<sub>f</sub>* = 0.30 (1% 7 N NH<sub>3</sub> in methanol, 2% methanol and 97% dichloromethane).

**<sup>1</sup>H NMR (401 MHz, DMSO-*d*<sub>6</sub>)**  $\delta$  12.23 (br.s, 1H), 7.81 (br.s, 1H), 7.68 (s, 1H), 7.47 – 7.46 (m, 1H), 7.37 (dt, *J* = 7.7, 1.6 Hz, 1H), 7.31 – 7.17 (m, 7H), 7.03 – 6.94 (m, 1H), 4.60 (br.s, 2H), 4.43 (d, *J* = 6.3 Hz, 2H).

**<sup>13</sup>C NMR (101 MHz, DMSO-*d*<sub>6</sub>)**  $\delta$  130.2 (CH), 129.6 (CH), 129.0 (CH), 128.1 (CH), 127.4 (CH), 126.5 (CH), 126.0 (CH), 121.5 (C), 43.9 (CH<sub>2</sub>). Six quaternary carbons and one aromatic CH not observed.

**HPLC:** *t<sub>R</sub>* = 5.31 min, > 96% purity (214 and 254 nm).

**HRMS:** (ESI+) calc. *m/z* for [C<sub>19</sub>H<sub>17</sub><sup>79</sup>BrN<sub>6</sub> + H]<sup>+</sup> 409.0771, found: 409.0781.

***N*<sup>2</sup>-(3-(Aminomethyl)benzyl)-*N*<sup>6</sup>-benzyl-9*H*-purine-2,6-diamine (15) [34]**

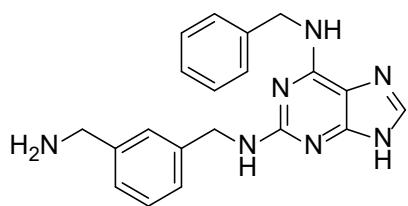

**General reaction procedure II from 2a** – The concentrated residue was added 1 M HCl. It was washed with dichloromethane (15 mL). The aqueous layer was added 1 M NaOH till pH ~ 10 and extracted with dichloromethane (3 x 15 mL). The organic extracts were combined, washed with brine, dried over  $\text{MgSO}_4$  and concentrated *in vacuo*. The crude material was recrystallised from chloroform to give the title compound as a yellow powder (13 mg, 14%).

**TLC:**  $R_f$  = 0.10 (2% 7 N  $\text{NH}_3$  in methanol, 8% methanol and 90% dichloromethane).

**$^1\text{H}$  NMR (401 MHz,  $\text{DMSO}-d_6$ )**  $\delta$  7.69 – 7.64 (m, 2H), 7.34 – 7.11 (m, 10H), 6.72 (t,  $J$  = 6.5 Hz, 1H), 4.62 (br.s, 2H), 4.43 (d,  $J$  = 6.3 Hz, 1H), 3.66 (app.s, 2H).

**$^{13}\text{C}$  NMR (101 MHz,  $\text{DMSO}-d_6$ )**  $\delta$  159.3 (C), 143.5 (C), 141.2 (C), 128.1 (CH), 127.8 (CH), 127.4 (CH), 126.4 (CH), 125.8 (CH), 125.0 (CH), 45.6 ( $\text{CH}_2$ ), 44.5 ( $\text{CH}_2$ ). Four quaternary carbons, two aromatic CH and one aliphatic  $\text{CH}_2$  not observed.

**HPLC:**  $t_R$  = 3.81 min, > 95% purity (214 and 254 nm).

**HRMS:** (ESI+) calc.  $m/z$  for  $[\text{C}_{20}\text{H}_{21}\text{N}_7 + \text{H}]^+$  360.1931, found 360.1936.

### Methyl 3-(((6-(benzylamino)-9H-purin-2-yl)amino)methyl)benzoate (16)

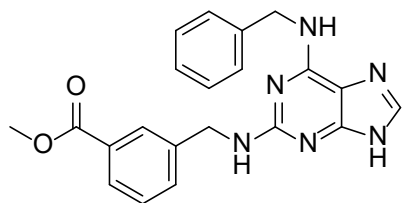

**General reaction procedure II from 2a** – The concentrated residue was added 0.5 M HCl. The precipitate was washed with 30%  $\text{NH}_4\text{OH}$ . The precipitate was then triturated with methanol to give the title product as a white powder (154 mg, 64% yield) after a second filtration.

**TLC:**  $R_f$  = 0.17 (1% 7 N  $\text{NH}_3$  in methanol and 99% dichloromethane).

**$^1\text{H}$  NMR (401 MHz,  $\text{CDCl}_3$  + a drop of  $\text{CD}_3\text{OD}$ )**  $\delta$  7.97 – 7.96 (m, 1H), 7.85 (dt,  $J$  = 7.7, 1.4 Hz, 1H), 7.49 – 7.45 (m, 2H), 7.30 (t,  $J$  = 7.7 Hz, 1H), 7.25 – 7.18 (m, 5H), 4.66 (s, 2H), 4.57 (s, 2H), 3.83 (s, 3H).



**<sup>13</sup>C NMR (101 MHz, CDCl<sub>3</sub> + a drop of CD<sub>3</sub>OD)** δ 167.4 (C), 140.5 (C), 138.9 (C), 132.1 (CH), 130.2 (C), 128.6 (CH), 128.6 (CH), 128.3 (CH), 127.7 (CH), 127.2 (CH), 52.2 (CH<sub>3</sub>), 45.5 (CH<sub>2</sub>). Four quaternary carbons and two aromatic CH not observed.

**HPLC:** *t<sub>R</sub>* = 4.96 min, > 95% purity (214 and 254 nm).

**HRMS:** (ESI+) calc. *m/z* for [C<sub>21</sub>H<sub>20</sub>N<sub>6</sub>O<sub>2</sub> + H]<sup>+</sup> 389.1721, found 389.1731.

### 3-(((6-(Benzylamino)-9*H*-purin-2-yl)amino)methyl)benzoic acid (**17**)

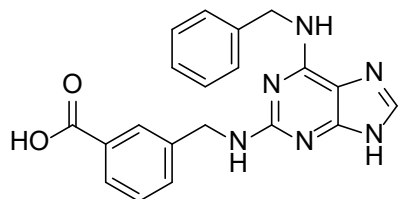

To a solution of methyl 3-(((6-(benzylamino)-9*H*-purin-2-yl)amino)methyl)benzoate (**16**, 101 mg, 257 μmol) in a mixture of tetrahydrofuran and water (1:1, 4 mL), was added lithium hydroxide monohydrate (27 mg, 644 μmol). The mixture warmed to 60 °C and stirred for 1 hour. After the consumption of starting material, it was concentrated *in vacuo*. It was then redissolved in water (10 mL) and washed with ethyl acetate (10 mL). The aqueous extract was acidified with 1 M HCl and the title compound was collected as a white powder precipitate (83 mg, 86% yield).

**TLC:** *R<sub>f</sub>* = 0.25 (1% acetic acid, 5% methanol and 94% dichloromethane).

**<sup>1</sup>H NMR (401 MHz, DMSO-*d*<sub>6</sub>)** δ 12.83 (br.s, 1H), 12.17 (br.s, 1H), 7.91 (s, 1H), 7.77 – 7.74 (m, 2H), 7.65 (s, 1H), 7.51 (d, *J* = 7.7 Hz, 1H), 7.37 (t, *J* = 7.6 Hz, 1H), 7.31 – 7.16 (m, 5H), 6.94 (s, 1H), 4.60 – 4.48 (m, 4H).

**<sup>13</sup>C NMR (101 MHz, DMSO-*d*<sub>6</sub>)** δ 167.4 (C), 142.2 (C), 131.5 (CH), 130.5 (C), 128.2 (CH), 128.1 (CH), 127.8 (CH), 127.4 (CH), 127.2 (CH), 126.4 (CH), 44.1 (CH<sub>2</sub>). Five quaternary carbons and one aromatic CH not observed.

**HPLC:** *t<sub>R</sub>* = 4.41 min, > 98% purity (214 and 254 nm).

**HRMS:** (ESI+) calc. *m/z* for [C<sub>20</sub>H<sub>18</sub>N<sub>6</sub>O<sub>2</sub> + H]<sup>+</sup> 375.1564, found 375.1575.

### *N*<sup>6</sup>-Benzyl-*N*<sup>2</sup>-(2-(trifluoromethyl)benzyl)-9*H*-purine-2,6-diamine (**18**)

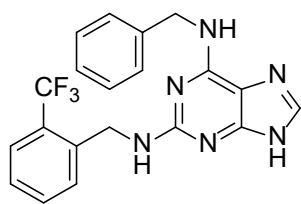

**General reaction procedure II from 2a** – To the concentrated residue, was added cold diethyl ether and the title compound was collected as a white powder (6.3 mg, 6.4% yield) after filtration.

**TLC:**  $R_f$  = 0.23 (1% 7 N  $\text{NH}_3$  in methanol, 40% ethyl acetate and 59% diethyl ether).

**$^1\text{H}$  NMR (401 MHz,  $\text{CDCl}_3$  + a drop of  $\text{CD}_3\text{OD}$ )**  $\delta$  7.68 (s, 1H), 7.62 (d,  $J$  = 7.8 Hz, 1H), 7.56 (d,  $J$  = 7.8 Hz, 1H), 7.46 (t,  $J$  = 7.6 Hz, 1H), 7.34 (t,  $J$  = 7.6 Hz, 1H), 7.24 – 7.15 (m, 5H), 4.80 (s, 2H), 4.62 (app. d,  $J$  = 12.6 Hz, 2H).

**$^{13}\text{C}$  NMR (101 MHz,  $\text{CD}_3\text{OD}$ )**  $\delta$  164.6 (C), 140.9 (C), 140.9 (C), 138.1 (C), 133.2 (CH), 129.4 (CH), 129.4 (CH), 128.5 (CH), 127.9 (CH), 127.7 (CH), 127.6 (C), 126.7 (CH), 126.6 (CH), 42.9 ( $\text{CH}_2$ ). Three quaternary carbons not observed.

**HPLC:**  $t_R$  = 5.34 min, > 95% purity (214 and 254 nm).

**HRMS:** (ESI+) calc.  $m/z$  for  $[\text{C}_{19}\text{H}_{19}\text{N}_7 + \text{H}]^+$  399.1540, found 399.1551.

**$N^6$ -Benzyl- $N^2$ -(4-(trifluoromethyl)benzyl)-9H-purine-2,6-diamine (19)**

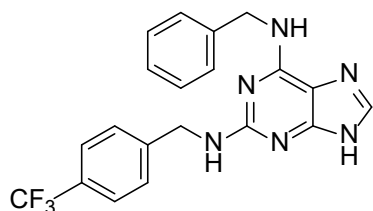

**General reaction procedure II from 2a** – To the concentrated residue, was added cold diethyl ether and the title compound was collected as a white powder (16 mg, 16% yield) after filtration.

**TLC:**  $R_f$  = 0.19 (1% 7 N  $\text{NH}_3$  in methanol, 40% ethyl acetate and 59% diethyl ether).

**$^1\text{H}$  NMR (401 MHz,  $\text{CDCl}_3$  + a drop of  $\text{CD}_3\text{OD}$ )**  $\delta$  7.62 (s, 1H), 7.48 (d,  $J$  = 8.2 Hz, 2H), 7.42 (d,  $J$  = 8.1 Hz, 2H), 7.25 – 7.16 (m, 5H), 4.66 (s, 2H), 4.62 (s, 2H).

**$^{13}\text{C}$  NMR (101 MHz,  $\text{CDCl}_3$  +  $\text{CD}_3\text{OD}$ )**  $\delta$  154.9 (C), 145.1 (C), 139.4 (C), 129.4 (C), 129.1 (C), 128.8 (CH), 127.8 (CH), 127.7 (CH), 127.5 (CH), 126.1 (C), 125.6 (CH), 125.53 (CH), 123.4 (C), 121.1 (C), 45.5 ( $\text{CH}_2$ ).

**HPLC:**  $t_R$  = 5.40 min, > 95% purity (214 and 254 nm).

**HRMS:** (ESI+) calc.  $m/z$  for  $[C_{19}H_{19}N_7 + H]^+$  399.1540, found 399.1557.

***N*<sup>6</sup>-Benzyl-*N*<sup>2</sup>-(2-(trifluoromethoxy)benzyl)-9*H*-purine-2,6-diamine (20)**

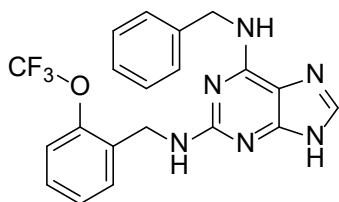

**General reaction procedure II from 2a** – The concentrated residue was added 0.5 M HCl. The precipitate was washed with 30%  $NH_4OH$ . The precipitate was then triturated with methanol to give the title product as a white powder (179 mg, 70% yield)

**TLC:**  $R_f$  = 0.16 (1% 7 N  $NH_3$  in methanol and 99% dichloromethane).

**<sup>1</sup>H NMR (401 MHz, DMSO-*d*<sub>6</sub>)**  $\delta$  7.93 (br.s, 1H), 7.42 – 7.18 (m, 11H), 7.07 (s, 1H), 4.76 – 4.59 (m, 4H).

**<sup>13</sup>C NMR (101 MHz, DMSO-*d*<sub>6</sub>)**  $\delta$  146.1 (C), 128.7 (CH), 128.1 (CH), 128.0 (CH), 127.5 (CH), 127.3 (CH), 126.6 (CH), 121.6 (C), 120.7 (C), 120.4 (CH), 119.0 (C). Four quaternary carbons, one aromatic CH and aliphatic  $CH_2$  not observed.

**HPLC:**  $t_R$  = 5.42 min, > 91% purity (214 and 254 nm).

**HRMS:** (ESI+) calc.  $m/z$  for  $[C_{20}H_{17}N_6O + H]^+$  415.1489, found 415.1499.

***N*<sup>6</sup>-Benzyl-*N*<sup>2</sup>-(4-(trifluoromethoxy)benzyl)-9*H*-purine-2,6-diamine (22)**

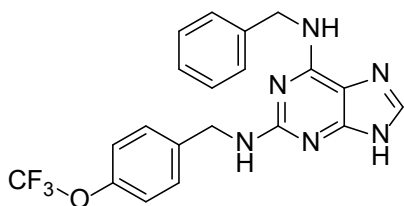

**General reaction procedure II from 2a** – To the concentrated residue, was added dichloromethane and petroleum ether. The precipitate was collected and was then washed with 0.5 M HCl followed by 30% ammonia solution. The title compound was collected as a white powder (28 mg, 27% yield).

**TLC:**  $R_f$  = 0.14 (1% 7 N  $NH_3$  in methanol and 99% dichloromethane).

**<sup>1</sup>H NMR (401 MHz, DMSO-*d*<sub>6</sub>)**  $\delta$  12.17 (br.s, 1H), 7.77 (br.s, 1H), 7.65 (s, 1H), 7.37 (d,  $J$  = 8.3 Hz, 2H), 7.31 – 7.29 (m, 2H), 7.26 – 7.16 (m, 5H), 6.90 – 6.88 (m, 1H), 4.60 (s, 2H), 4.45 (d,  $J$  = 6.3 Hz, 2H).

**<sup>13</sup>C NMR (101 MHz, DMSO-*d*<sub>6</sub>)** δ 159.2 (C), 146.7 (C), 141.1 (C), 128.7 (CH), 128.0 (CH), 127.3 (CH), 126.4 (CH), 121.4 (C), 120.6 (CH), 43.8 (CH<sub>2</sub>). Four quaternary carbons and one aromatic CH not observed.

**HPLC:** *t<sub>R</sub>* = 5.50 min, > 91% purity (214 and 254 nm).

**HRMS:** (ESI+) calc. *m/z* for [C<sub>20</sub>H<sub>17</sub>N<sub>6</sub>O + H]<sup>+</sup> 415.1489, found 415.1494.

***N*<sup>6</sup>-Benzyl-*N*<sup>2</sup>-(4-fluorobenzyl)-9*H*-purine-2,6-diamine (23) [34]**

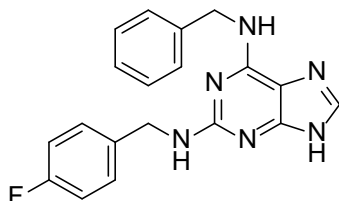

**General reaction procedure II from 2a** – To the concentrated residue, was added cold diethyl ether and the title compound was collected as a white powder (26 mg, 36% yield) after filtration.

**TLC:** *R<sub>f</sub>* = 0.18 (1% 7 N NH<sub>3</sub> in methanol, 40% ethyl acetate and 59% diethyl ether).

**<sup>1</sup>H NMR (401 MHz, CDCl<sub>3</sub>)** δ 7.45 (s, 1H), 7.29 – 7.19 (m, 7H), 6.91 (t, *J* = 8.7 Hz, 2H), 4.69 – 4.64 (m, 2H), 4.56 – 4.51 (m, 2H).

**<sup>13</sup>C NMR (101 MHz, CDCl<sub>3</sub> + drop of CD<sub>3</sub>OD)** δ 163.1 (C), 160.7 (C), 154.6 (C), 138.9 (C), 135.6 (C), 135.3 (CH), 128.9 (d, *J* = 7.8 Hz, CH), 128.5 (CH), 127.5 (CH), 127.2 (CH), 115.2 (d, *J* = 21.6 Hz, CH), 45.0 (CH<sub>2</sub>). Two quaternary carbons not observed.

**HPLC:** *t<sub>R</sub>* = 5.02 min, > 95% purity (214 and 254 nm).

**HRMS:** (ESI+) calc. *m/z* for [C<sub>19</sub>H<sub>17</sub>FN<sub>6</sub> + H]<sup>+</sup> 349.1571, found 349.1586.

***N*<sup>6</sup>-Benzyl-*N*<sup>2</sup>-(2-methoxybenzyl)-9*H*-purine-2,6-diamine (24)**

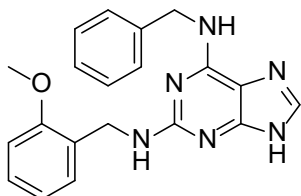

**General reaction procedure II from 2a** – The concentrated residue was purified by column chromatography (2% 7 N NH<sub>3</sub> in methanol, 3% methanol and 95% dichloromethane). It was then triturated with a mixture of dichloromethane and petroleum ether to give the title compound as a beige powder (8.8 mg, 9.9% yield) after filtration.

**TLC:**  $R_f$  = 0.17 (1% 7 N  $\text{NH}_3$  in methanol, 40% ethyl acetate and 59% diethyl ether).

**$^1\text{H}$  NMR (401 MHz,  $\text{CDCl}_3$ )**  $\delta$  7.35 – 7.18 (m, 8H), 6.89 – 6.85 (m, 2H), 4.77 (br.s, 2H), 4.65 (app. d,  $J$  = 5.7 Hz, 2H), 3.84 – 3.82 (m, 3H).

**$^{13}\text{C}$  NMR (101 MHz,  $\text{CDCl}_3$ )**  $\delta$  157.5 (C), 128.8 (CH), 128.7 (CH), 128.5 (CH), 128.0 (CH), 127.4 (CH), 120.7 (CH), 110.3 (CH), 55.4 ( $\text{CH}_3$ ), 41.4 ( $\text{CH}_2$ ). Six quaternary carbons and one CH not observed.

**HPLC:**  $t_R$  = 5.11 min, > 95% purity (214 and 254 nm).

**HRMS:** (ESI+) calc.  $m/z$  for  $[\text{C}_{19}\text{H}_{19}\text{N}_7 + \text{H}]^+$  361.1771, found 361.1778.

**$N^6$ -Benzyl- $N^2$ -(pyrimidin-2-ylmethyl)-9H-purine-2,6-diamine (25)**

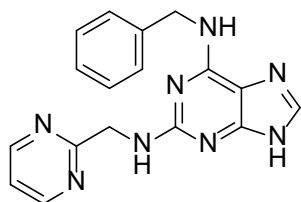

**General reaction procedure II from 2a** – The concentrated residue was purified by column chromatography (2% 7 N  $\text{NH}_3$  in methanol, 5% methanol and 93% dichloromethane). It was then triturated with dichloromethane to give the title compound as a yellow powder (10 mg, 7.3% yield) after filtration.

**TLC:**  $R_f$  = 0.21 (2% 7 N  $\text{NH}_3$  in methanol, 5% methanol and 93% dichloromethane).

**$^1\text{H}$  NMR (401 MHz,  $\text{DMSO}-d_6$ )**  $\delta$  12.18 (s, 1H), 8.71 (d,  $J$  = 4.9 Hz, 2H), 7.71 (s, 1H), 7.64 (s, 1H), 7.33 – 7.16 (m, 6H), 6.57 (s, 1H), 4.63 (d,  $J$  = 6.0 Hz, 4H).

**$^{13}\text{C}$  NMR (101 MHz,  $\text{DMSO}-d_6$ )**  $\delta$  159.1 (C), 157.1 (CH), 135.3 (CH), 128.0 (CH), 127.4 (CH), 126.4 (CH), 119.4 (CH), 47.3 ( $\text{CH}_2$ ). Five quaternary carbons not observed.

**HPLC:**  $t_R$  = 3.88 min, > 95% purity (214 and 254 nm).

**HRMS:** (ESI+) calc.  $m/z$  for  $[\text{C}_{17}\text{H}_{16}\text{N}_8 + \text{H}]^+$  333.1571, found: 333.1578.

**$N^6$ -Benzyl- $N^2$ -((1-methyl-1H-imidazol-2-yl)methyl)-9H-purine-2,6-diamine (26)**

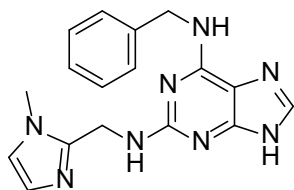

**General reaction procedure II from 2a** – To the concentrated residue, was added 0.5 M HCl and the insoluble compounds were filtered. The filtrate was made basic to pH ~ 10 and extracted with dichloromethane (3 x 10 mL). The organic extracts were combined, washed with brine, dried over MgSO<sub>4</sub> and concentrated *in vacuo*. The crude material was triturated with a mixture of dichloromethane and petroleum ether to give the title product as a brown powder (2.3 mg, 2% yield).

**TLC:**  $R_f$  = 0.30 (1% 7 N NH<sub>3</sub> in methanol, 5% methanol and 94% dichloromethane)

**<sup>1</sup>H NMR (401 MHz, DMSO-*d*<sub>6</sub>)**  $\delta$  12.25 (s, 1H), 7.80 (br.s, 1H), 7.68 (s, 1H), 7.36 (d,  $J$  = 7.1 Hz, 2H), 7.27 (t,  $J$  = 7.5 Hz, 2H), 7.21 – 7.17 (m, 1H), 7.02 (d,  $J$  = 1.2 Hz, 1H), 6.75 (d,  $J$  = 1.2 Hz, 1H), 6.44 (br.t,  $J$  = 5.0 Hz, 1H), 4.64 (s, 2H), 4.2a (d,  $J$  = 5.6 Hz, 2H), 3.57 (s, 3H).

**<sup>13</sup>C NMR (101 MHz, DMSO-*d*<sub>6</sub>)**  $\delta$  158.8 (C), 145.7 (C), 135.4 (CH), 128.1 (CH), 127.4 (CH), 126.4 (CH), 126.1 (CH), 121.5 (CH), 37.7 (CH<sub>2</sub>), 32.3 (CH<sub>3</sub>). Four quaternary carbons not observed.

**HPLC:**  $t_R$  = 3.20 min, > 95% purity (214 and 254 nm).

**HRMS:** (ESI+) calc.  $m/z$  for [C<sub>17</sub>H<sub>18</sub>N<sub>8</sub> + H]<sup>+</sup> 335.1727, found 335.1736.

***N*<sup>6</sup>-Benzyl-*N*<sup>2</sup>-((tetrahydro-2H-pyran-4-yl)methyl)-9H-purine-2,6-diamine (27)**

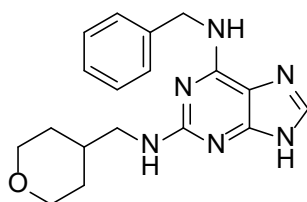

**General reaction procedure II from 2a** – The concentrated residue was purified by column chromatography (2% 7 N NH<sub>3</sub> in methanol, 5% methanol and 93% dichloromethane) to give the title compound as a beige powder (13 mg, 18% yield).

**TLC:**  $R_f$  = 0.46 (2% 7 N NH<sub>3</sub> in methanol, 5% methanol and 93% dichloromethane).

**<sup>1</sup>H NMR (401 MHz, DMSO-*d*<sub>6</sub>)**  $\delta$  12.12 (s, 1H), 7.68 – 7.63 (m, 2H), 7.35 – 7.32 (m, 2H), 7.29 – 7.26 (m, 2H), 7.21 – 7.17 (m, 1H), 6.27 (t,  $J$  = 5.9 Hz, 1H), 4.64 (br.s, 2H), 3.79 (d,  $J$  = 10.3 Hz, 2H), 3.17 (t,  $J$  = 11.6 Hz, 2H), 3.08 (t,  $J$  = 6.5 Hz, 2H), 1.74 (br.s, 1H), 1.53 (d,  $J$  = 13.2 Hz, 2H), 1.16 – 1.07 (m, 2H).

**<sup>13</sup>C NMR (101 MHz, DMSO-*d*<sub>6</sub>)**  $\delta$  159.6 (C), 135.1 (CH), 128.1 (CH), 127.2 (CH), 126.4 (CH), 66.9 (CH<sub>2</sub>), 47.1 (CH<sub>2</sub>), 30.8 (CH), 30.7 (CH<sub>2</sub>). Four quaternary carbons and one CH<sub>2</sub> not observed.

**HPLC:**  $t_R$  = 4.37 min, > 95% purity (214 and 254 nm).

**HRMS:** (ESI+) calc.  $m/z$  for [C<sub>18</sub>H<sub>22</sub>N<sub>6</sub>O + H]<sup>+</sup> 339.1928, found: 339.1935.

## 2-((6-(Benzylamino)-9H-purin-2-yl)amino)ethan-1-ol (28) [43]

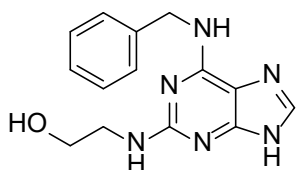

**General reaction procedure II from 2a** – The concentrated residue was purified by column chromatography (2% 7 N NH<sub>3</sub> in methanol, 10% methanol and 88% ethyl acetate) to give the title compound as a white powder (36 mg, 61% yield).

**TLC:** *R<sub>f</sub>* = 0.25 (2% 7 N NH<sub>3</sub> in methanol, 10% methanol and 88% ethyl acetate).

**<sup>1</sup>H NMR (401 MHz, DMSO-*d*<sub>6</sub>)**  $\delta$  12.17 (s, 1H), 7.70 (br.s, 1H), 7.64 (s, 1H), 7.36 – 7.34 (m, 2H), 7.30 – 7.26 (m, 2H), 7.21 – 7.17 (m, 1H), 6.04 (t, *J* = 5.6 Hz, 1H), 4.65 – 4.63 (m, 3H), 3.49 (q, *J* = 5.7 Hz, 2H), 3.28 (q, *J* = 6.1 Hz, 2H).

**<sup>13</sup>C NMR (101 MHz, DMSO-*d*<sub>6</sub>)**  $\delta$  159.4 (C), 135.2 (CH), 128.1 (CH), 127.3 (CH), 126.4 (CH), 60.4 (CH<sub>2</sub>), 43.9 (CH<sub>2</sub>). Four quaternary carbons and one CH<sub>2</sub> not observed.

**HPLC:** *t<sub>R</sub>* = 3.685 min, > 97% purity (214 and 254 nm).

**HRMS:** (ESI+) calc. *m/z* for [C<sub>14</sub>H<sub>16</sub>N<sub>6</sub>O + H]<sup>+</sup> 285.1458, found 285.1466.

## *N*<sup>6</sup>-Benzyl-*N*<sup>2</sup>-(2-methoxyethyl)-9H-purine-2,6-diamine (29)

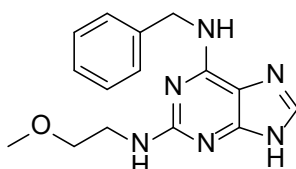

**General reaction procedure II from 2a** – To the concentrated residue, was added cold dichloromethane and the title compound was collected as a white powder (25 mg, 41% yield) after filtration.

**TLC:** *R<sub>f</sub>* = 0.40 (1% 7 N NH<sub>3</sub> in methanol, 5% methanol and 94% dichloromethane).

**<sup>1</sup>H NMR (401 MHz, DMSO-*d*<sub>6</sub>)**  $\delta$  12.17 (s, 1H), 7.72 (br.s, 1H), 7.65 (s, 1H), 7.35 – 7.33 (m, 2H), 7.30 – 7.26 (m, 2H), 7.21 – 7.17 (m, 1H), 6.09 (t, *J* = 5.3 Hz, 1H), 4.63 (br.s, 2H), 3.39 – 3.35 (m, 4H), 3.21 (s, 3H).

**<sup>13</sup>C NMR (101 MHz, DMSO-*d*<sub>6</sub>)**  $\delta$  159.2 (C), 140.8 (C), 135.2 (CH), 128.1 (CH), 127.3 (CH), 126.4 (CH), 70.9 (CH<sub>2</sub>), 57.9 (CH<sub>3</sub>), 40.6 (CH<sub>2</sub>). Three quaternary carbons and one CH<sub>2</sub> not observed.

**HPLC:**  $t_R$  = 4.16 min, > 95% purity (214 and 254 nm).

**HRMS:** (ESI+) calc.  $m/z$  for  $[C_{15}H_{18}N_6O + H]^+$  299.1615, found: 299.1621.

***N*<sup>6</sup>-(2-Methoxyethyl)-*N*<sup>2</sup>-(3-(trifluoromethyl)benzyl)-9*H*-purine-2,6-diamine (30) [39]**

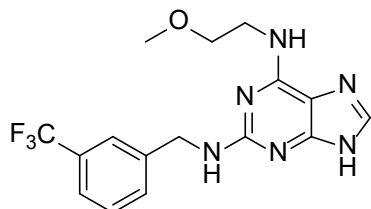

**General procedure IV from 5a** – The concentrated residue was added cold dichloromethane. The precipitate was collected and was then washed with 0.5 M HCl followed by 30% ammonia solution. The title compound was collected as a yellow powder (30 mg, 53% yield).

**TLC:**  $R_f$  = 0.40 (1% 7 N  $NH_3$  in methanol, 5% methanol and 94% dichloromethane).

**<sup>1</sup>H NMR (401 MHz, DMSO-*d*<sub>6</sub>)**  $\delta$  12.21 (br.s, 1H), 7.67 – 7.65 (m, 2H), 7.63 – 7.60 (m, 1H), 7.56 – 7.49 (m, 2H), 7.14 – 7.02 (m, 2H), 4.53 (d,  $J$  = 6.3 Hz, 2H), 3.53 – 3.51 (m, 2H), 3.42 – 3.41 (m, 2H), 3.21 (s, 3H).

**<sup>13</sup>C NMR (101 MHz, DMSO-*d*<sub>6</sub>)**  $\delta$  143.2 (C), 131.2 (CH), 129.1 (CH), 129.0 (C), 128.7 (C), 125.8 (C), 123.4 (d,  $J$  = 4.0 Hz, CH), 123.1 (C), 123.0 (d,  $J$  = 3.9 Hz, CH), 70.6 (CH<sub>2</sub>), 57.9 (CH<sub>2</sub>), 57.9 (CH<sub>3</sub>), 44.2 (CH<sub>2</sub>). Two quaternary carbons and one aromatic CH not observed.

**HPLC:**  $t_R$  = 4.80 min, > 98% purity (214 and 254 nm).

**HRMS:** (ESI+) calc.  $m/z$  for  $[C_{16}H_{17}F_3N_6O + H]^+$  367.1489, found 367.1497.

***N*<sup>2</sup>-(3-Bromobenzyl)-*N*<sup>6</sup>-(2-methoxyethyl)-9*H*-purine-2,6-diamine (31)**

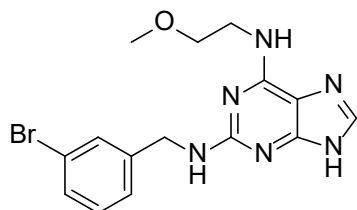

**General procedure IV from 5b** – The concentrated residue was added cold dichloromethane and the title compound was collected as a white powder (101 mg, 90% yield).

**TLC:**  $R_f$  = 0.18 (1% 7 N  $NH_3$  in methanol, 2% methanol and 97% dichloromethane).



**<sup>1</sup>H NMR (401 MHz, DMSO-*d*<sub>6</sub>)** δ 12.16 (br.s, 1H), 7.64 (s, 1H), 7.49 (t, *J* = 1.8 Hz, 1H), 7.37 (ddd, *J* = 7.8, 2.1, 1.2 Hz, 1H), 7.31 (dt, *J* = 7.7, 1.3 Hz, 1H), 7.24 (t, *J* = 7.7 Hz, 1H), 7.04 (br.s, 1H), 6.91 (br.s, 1H), 4.44 (d, *J* = 6.4 Hz, 2H), 3.55 (app.br.s, 2H), 3.44 – 3.42 (m, 2H), 3.23 (s, 3H).

**<sup>13</sup>C NMR (101 MHz, DMSO-*d*<sub>6</sub>)** δ 130.4 (CH), 129.8 (CH), 129.4 (CH), 126.1 (CH), 121.5 (C), 70.1 (CH<sub>2</sub>), 57.9 (CH<sub>3</sub>), 43.9 (CH<sub>2</sub>). Five quaternary carbons, one aromatic CH and one aliphatic CH<sub>2</sub> (under DMSO-*d*<sub>6</sub> peak) not observed.

**HPLC:** *t<sub>R</sub>* = 4.61 min, > 98% purity (214 and 254 nm).

**HRMS:** (ESI+) calc. *m/z* for [C<sub>15</sub>H<sub>17</sub><sup>79</sup>BrN<sub>6</sub>O + H]<sup>+</sup> 377.0720, found: 377.0727.

***N*<sup>2</sup>-(3-Iodobenzyl)-*N*<sup>6</sup>-(2-methoxyethyl)-9*H*-purine-2,6-diamine (32)**

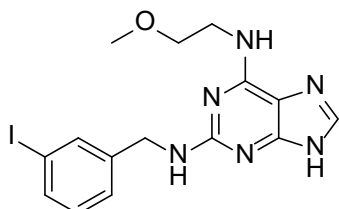

**General reaction procedure II from 2b** – The concentrated residue was purified by column chromatography (1% 7 N NH<sub>3</sub> in methanol, 2% methanol and 97% chloroform). It was then triturated with dichloromethane to give the title compound as an off-white powder (37 mg, 31% yield) after filtration.

**TLC:** *R<sub>f</sub>* = 0.13 (1% 7 N NH<sub>3</sub> in methanol, 2% methanol and 97% chloroform).

**<sup>1</sup>H NMR (401 MHz, DMSO-*d*<sub>6</sub>)** δ 12.15 (s, 1H), 7.68 (t, *J* = 1.7 Hz, 1H), 7.63 (s, 1H), 7.54 (ddd, *J* = 7.8, 1.8, 1.1 Hz, 1H), 7.32 (dt, *J* = 7.9, 1.2 Hz, 1H), 7.10 – 7.03 (m, 2H), 6.89 (br.s, 1H), 4.40 (d, *J* = 6.4 Hz, 2H), 3.59 – 3.52 (m, 2H), 3.45 – 3.42 (m, 2H), 3.23 (s, 3H).

**<sup>13</sup>C NMR (101 MHz, DMSO-*d*<sub>6</sub>)** δ 159.1 (C), 144.5 (C), 135.5 (CH), 134.9 (CH), 130.3 (CH), 126.4 (CH), 119.6 (C), 94.6 (C), 70.6 (CH<sub>2</sub>), 57.9 (CH<sub>3</sub>), 43.9 (CH<sub>2</sub>). Two quaternary carbons, one aromatic CH and one aliphatic CH<sub>2</sub> not observed.

**HPLC:** *t<sub>R</sub>* = 4.90 min, > 96% purity (214 and 254 nm).

**HRMS:** (ESI+) calc. *m/z* for [C<sub>15</sub>H<sub>17</sub>IN<sub>6</sub>O + H]<sup>+</sup> 425.0581, found 425.0592.

**Methyl 3-(((6-((2-methoxyethyl)amino)-9*H*-purin-2-yl)amino)methyl)benzoate (33)**

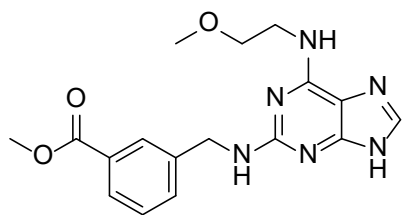

**General reaction procedure II from 2b** – The concentrated residue did not require further purification. The title compound was a yellow powder (734 mg, 55% yield).

**TLC:**  $R_f$  = 0.15 (2% 7 N  $\text{NH}_3$  in methanol, 3% methanol and 95% dichloromethane).

**$^1\text{H}$  NMR (401 MHz,  $\text{DMSO}-d_6$ )**  $\delta$  12.15 (br.s, 1H), 7.94 – 7.93 (m, 1H), 7.78 (dt,  $J$  = 7.7, 1.5 Hz, 1H), 7.63 – 7.57 (m, 2H), 7.43 (t,  $J$  = 7.7 Hz, 1H), 7.02 – 6.95 (m, 2H), 4.50 (d,  $J$  = 6.4 Hz, 2H), 3.82 (s, 3H), 3.54 (app.br.s, 2H), 3.43 (app.s, 2H), 3.22 (s, 3H).

**$^{13}\text{C}$  NMR (101 MHz,  $\text{DMSO}-d_6$ )**  $\delta$  166.3 (C), 132.1 (CH), 129.6 (C), 128.7 (CH), 127.8 (CH), 127.4 (CH), 70.2 ( $\text{CH}_2$ ), 57.9 ( $\text{CH}_3$ ), 52.1 ( $\text{CH}_3$ ), 44.2 ( $\text{CH}_2$ ). Five quaternary carbons, one aromatic CH and one aliphatic  $\text{CH}_2$  not observed.

**HPLC:**  $t_R$  = 4.12 min, > 98% purity (214 and 254 nm).

**HRMS:** (ESI+) calc.  $m/z$  for  $[\text{C}_{17}\text{H}_{20}\text{N}_6\text{O}_3 + \text{H}]^+$  357.1670, found 357.1680.

### 3-(((6-((2-Methoxyethyl)amino)-9H-purin-2-yl)amino)methyl)benzoic acid (34)

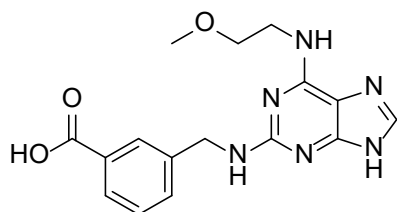

To a solution of methyl 3-(((6-((2-methoxyethyl)amino)-9H-purin-2-yl)amino)methyl)benzoate (**33**, 500 mg, 1.4 mmol) in a mixture of tetrahydrofuran and water (1:1, 4 mL), was added lithium hydroxide monohydrate (27 mg, 644  $\mu\text{mol}$ ). The mixture warmed to 60  $^\circ\text{C}$  and stirred for 1 hour. After the consumption of starting material, it was concentrated *in vacuo*. It was then redissolved in water (10 mL) and washed with ethyl acetate (10 mL). The aqueous extract was acidified with 1 M HCl and the title compound was collected as a white powder precipitate (388 mg, 81% yield).

**TLC:**  $R_f$  = 0.51 (1% acetic acid, 10% methanol and 89% dichloromethane).

**<sup>1</sup>H NMR (401 MHz, DMSO-*d*<sub>6</sub>)**  $\delta$  12.16 (br.s, 1H), 7.91 (br.t, *J* = 1.8 Hz, 1H), 7.76 (dt, *J* = 7.7, 1.5 Hz, 1H), 7.64 (s, 1H), 7.55 (dt, *J* = 7.7, 1.5 Hz, 1H), 7.40 (t, *J* = 7.6 Hz, 1H), 7.01 – 6.93 (m, 2H), 4.50 (d, *J* = 6.4 Hz, 2H), 3.55 – 3.41 (m, 4H), 3.22 (s, 3H).

**<sup>13</sup>C NMR (101 MHz, DMSO-*d*<sub>6</sub>)**  $\delta$  167.5 (C), 159.2 (C), 142.2 (C), 131.5 (CH), 130.6 (C), 128.2 (CH), 127.8 (CH), 127.2 (CH), 70.6 (CH<sub>2</sub>), 57.8 (CH<sub>3</sub>), 44.2 (CH<sub>2</sub>).

**HPLC:** *t<sub>R</sub>* = 3.63 min, > 99% purity (214 and 254 nm).

**HRMS:** (ESI+) calc. *m/z* for [C<sub>16</sub>H<sub>18</sub>N<sub>6</sub>O<sub>3</sub> + H]<sup>+</sup> 343.1513, found 343.1522.

***N*<sup>6</sup>-(2-Methoxyethyl)-*N*<sup>2</sup>-(pyridin-3-ylmethyl)-9*H*-purine-2,6-diamine (35)**

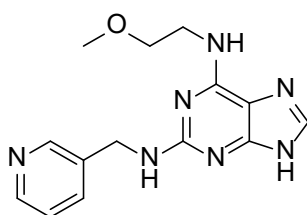

**General reaction procedure II from 2b** – The concentrated residue was purified by column chromatography (1% 7 N NH<sub>3</sub> in methanol, 5% methanol and 94% dichloromethane). It was then triturated with dichloromethane to give the title compound as an off-white powder (54 mg, 63% yield) after filtration.

**TLC:** *R<sub>f</sub>* = 0.50 (1% 7 N NH<sub>3</sub> in methanol, 5% methanol and 94% dichloromethane).

**<sup>1</sup>H NMR (401 MHz, DMSO-*d*<sub>6</sub>)**  $\delta$  12.16 (br.s, 1H), 8.53 (d, *J* = 2.2 Hz, 1H), 8.39 (dd, *J* = 4.8, 1.7 Hz, 1H), 7.70 (dt, *J* = 7.9, 2.0 Hz, 1H), 7.64 (s, 1H), 7.29 (ddd, *J* = 7.8, 4.8, 0.9 Hz, 1H), 7.03 (br.s, 1H), 6.90 (br.s, 1H), 4.45 (d, *J* = 6.3 Hz, 2H), 3.55 (app.br.s, 2H), 3.45 – 3.42 (m, 2H), 3.23 (s, 3H).

**<sup>13</sup>C NMR (101 MHz, DMSO-*d*<sub>6</sub>)**  $\delta$  159.1 (C), 148.7 (CH), 147.5 (CH), 136.8 (C), 135.3 (CH), 134.8 (CH), 123.3 (CH), 70.6 (CH<sub>2</sub>), 57.9 (CH<sub>3</sub>), 42.2 (CH<sub>2</sub>). Three quaternary carbons and one aliphatic CH<sub>2</sub> not observed.

**HPLC:** *t<sub>R</sub>* = 2.82 min, > 97% purity (214 and 254 nm).

**HRMS:** (ESI+) calc. *m/z* for [C<sub>14</sub>H<sub>17</sub>N<sub>7</sub>O + H]<sup>+</sup> 300.1567, found 300.1574.

**3-(((6-((2-Methoxyethyl)amino)-9*H*-purin-2-yl)amino)methyl)phenol (36)**

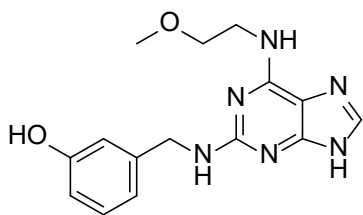

**General procedure IV from 5c** – The concentrated residue was added cold dichloromethane and the title compound was collected as a white powder (64 mg, 56% yield).

**TLC:**  $R_f$  = 0.30 (1% 7 N  $\text{NH}_3$  in methanol, 7% methanol and 92% dichloromethane).

**$^1\text{H}$  NMR (401 MHz,  $\text{DMSO}-d_6$ )**  $\delta$  12.16 (s, 1H), 9.19 (s, 1H), 7.64 (s, 1H), 7.04 (t,  $J$  = 8.0 Hz, 2H), 6.75 – 6.70 (m, 3H), 6.57 – 6.54 (m, 1H), 4.38 (d,  $J$  = 6.3 Hz, 2H), 3.56 – 3.44 (m, 4H), 3.23 (s, 3H).

**$^{13}\text{C}$  NMR (101 MHz,  $\text{DMSO}-d_6$ )**  $\delta$  159.3 (C), 157.2 (C), 143.1 (C), 135.2 (CH), 128.9 (CH), 117.5 (CH), 113.7 (CH), 113.1 (CH), 70.6 ( $\text{CH}_2$ ), 57.9 ( $\text{CH}_3$ ), 44.3 ( $\text{CH}_2$ ). Three quaternary carbons and one aliphatic  $\text{CH}_2$  not observed.

**HPLC:**  $t_R$  = 3.59 min, > 95% purity (214 and 254 nm).

**HRMS:** (ESI+) calc.  $m/z$  for  $[\text{C}_{15}\text{H}_{18}\text{N}_6\text{O}_2 + \text{H}]^+$  315.1564, found 315.1575.

#### 4-((6-((2-Methoxyethyl)amino)-9H-purin-2-yl)amino)phenol (37)

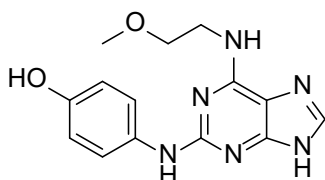

To a solution of 2-fluoro-*N*-(2-methoxyethyl)-9H-purin-6-amine (**2b**, 60 mg, 284  $\mu\text{mol}$ ) in *n*-butanol (1 mL), was added 4-aminophenol (46 mg, 426  $\mu\text{mol}$ ) and trifluoroacetic acid (42 mg, 28  $\mu\text{L}$ , 369  $\mu\text{mol}$ ). The reaction was heated to reflux and stirred overnight (16 hours). It was then cooled to room temperature and concentrated *in vacuo*. The residue was purified by column chromatography (1% 7 N  $\text{NH}_3$  in methanol, 5% methanol and 94% dichloromethane) to give the title compound as a brown powder (53 mg, 62% yield).

**TLC:**  $R_f$  = 0.28 (2% 7 N  $\text{NH}_3$  in methanol, 2% methanol and 96% dichloromethane).

**$^1\text{H}$  NMR (401 MHz,  $\text{DMSO}-d_6$ )**  $\delta$  12.31 (br.s, 1H), 8.87 (s, 1H), 8.45 (s, 1H), 7.74 (s, 1H), 7.53 (d,  $J$  = 8.6 Hz, 2H), 7.18 (br.s, 1H), 6.64 (d,  $J$  = 8.7 Hz, 2H), 3.63 (app.br.s, 2H), 3.53 (t,  $J$  = 5.9 Hz, 2H), 3.28 (s, 3H).

**<sup>13</sup>C NMR (101 MHz, DMSO-*d*<sub>6</sub>)**  $\delta$  156.7 (C), 151.3 (C), 135.9 (CH), 133.6 (C), 120.3 (CH), 114.8 (CH), 70.7 (CH<sub>2</sub>), 58.0 (CH<sub>3</sub>). Three quaternary carbons and one aliphatic CH<sub>2</sub> not observed.

**HPLC:**  $t_R$  = 3.21 min, > 95% purity (214 and 254 nm).

**HRMS:** (ESI+) calc.  $m/z$  for [C<sub>14</sub>H<sub>16</sub>N<sub>6</sub>O<sub>2</sub> + H]<sup>+</sup> 301.1408, found 301.1419.

***N*<sup>2</sup>-(4-Methoxybenzyl)-*N*<sup>6</sup>-(2-methoxyethyl)-9*H*-purine-2,6-diamine (38)**

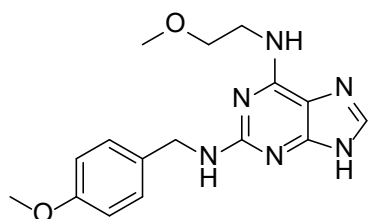

**General reaction procedure II from 2b** – To the concentrated residue, was added cold dichloromethane and the precipitate was collected. The precipitate was then washed with 1 M HCl followed by 30% ammonia solution. The title compound was collected as a yellow powder (25 mg, 27% yield).

**TLC:**  $R_f$  = 0.18 (2% 7 N NH<sub>3</sub> in methanol, 3% methanol and 95% dichloromethane).

**<sup>1</sup>H NMR (401 MHz, DMSO-*d*<sub>6</sub>)**  $\delta$  12.45 (br.s, 1H), 7.76 (s, 1H), 7.33 – 7.23 (m, 3H), 7.08 – 7.05 (m, 1H), 6.84 (d,  $J$  = 8.7 Hz, 2H), 4.40 (d,  $J$  = 6.2 Hz, 2H), 3.70 (s, 3H), 3.59 (app.br.s, 2H), 3.46 (t,  $J$  = 5.8 Hz, 2H), 3.24 (s, 3H).

**<sup>13</sup>C NMR (101 MHz, DMSO-*d*<sub>6</sub>)**  $\delta$  157.9 (C), 128.3 (CH), 113.5 (CH), 70.5 (CH<sub>2</sub>), 57.9 (CH<sub>3</sub>), 55.0 (CH<sub>3</sub>), 43.9 (CH<sub>2</sub>). Five quaternary carbons, one aromatic CH and one aliphatic CH<sub>2</sub> not observed.

**HPLC:**  $t_R$  = 4.07 min, > 98% purity (214 and 254 nm).

**HRMS:** (ESI+) calc.  $m/z$  for [C<sub>16</sub>H<sub>20</sub>N<sub>6</sub>O<sub>2</sub> + H]<sup>+</sup> 329.1721, found 329.1713.

***N*<sup>6</sup>-(2-Methoxyethyl)-*N*<sup>2</sup>-(4-methoxyphenethyl)-9*H*-purine-2,6-diamine (39)**

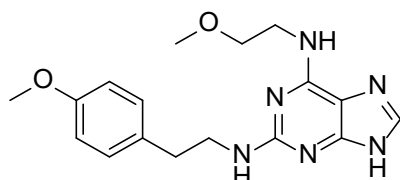

**General reaction procedure II from 2b** – The concentrated residue was purified by column chromatography (2% 7 N NH<sub>3</sub> in methanol, 2% methanol and 96% dichloromethane). It was then

trituated with dichloromethane to give the title compound as a white powder (43 mg, 44% yield) after filtration.

**TLC:**  $R_f$  = 0.30 (2% 7 N  $\text{NH}_3$  in methanol, 2% methanol and 96% dichloromethane).

**$^1\text{H}$  NMR (401 MHz,  $\text{DMSO}-d_6$ )**  $\delta$  12.14 (s, 1H), 7.63 (br.s, 1H), 7.15 (d,  $J$  = 8.6 Hz, 2H), 6.97 (br.s, 1H), 6.85 (d,  $J$  = 8.7 Hz, 2H), 6.19 (br.s, 1H), 3.72 (s, 3H), 3.60 (app.br.s, 2H), 3.50 (t,  $J$  = 5.8 Hz, 2H), 3.43 – 3.37 (m, 2H), 3.26 (s, 3H), 2.77 (dd,  $J$  = 8.6, 6.4 Hz, 2H).

**$^{13}\text{C}$  NMR (101 MHz,  $\text{DMSO}-d_6$ )**  $\delta$  159.3 (C), 157.5 (C), 154.5 (C), 135.1 (CH), 132.0 (C), 129.5 (CH), 113.7 (CH), 70.7 ( $\text{CH}_2$ ), 57.9 ( $\text{CH}_3$ ), 55.0 ( $\text{CH}_3$ ), 43.2 ( $\text{CH}_2$ ), 34.6 ( $\text{CH}_2$ ). Two quaternary carbons and one aliphatic  $\text{CH}_2$  not observed.

**HPLC:**  $t_R$  = 4.31 min, > 98% purity (214 and 254 nm).

**HRMS:** (ESI+) calc.  $m/z$  for  $[\text{C}_{17}\text{H}_{22}\text{N}_6\text{O}_2 + \text{H}]^+$  343.1877, found 343.1886.

#### **$N^6$ -(2-Methoxyethyl)- $N^2$ -(4-methoxyphenyl)-9H-purine-2,6-diamine (40)**

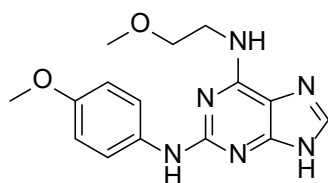

To a solution of 2-fluoro- $N$ -(2-methoxyethyl)-9H-purin-6-amine (**2b**, 60 mg, 284  $\mu\text{mol}$ ) in  $n$ -butanol (1 mL), was added 4-methoxyaniline (245 mg, 229  $\mu\text{L}$ , 2.0 mmol) and trifluoroacetic acid (42 mg, 28  $\mu\text{L}$ , 369  $\mu\text{mol}$ ). The reaction was heated to reflux and stirred overnight (16 hours). It was then cooled to room temperature and the precipitate formed was collected, using cold  $n$ -butanol. The collected precipitate was trituated with methanol to give the title compound as a grey powder (21 mg, 24% yield) after filtration.

**TLC:**  $R_f$  = 0.31 (5% methanol in dichloromethane).

**$^1\text{H}$  NMR (401 MHz,  $\text{DMSO}-d_6$ )**  $\delta$  8.95 (br.s, 1H), 8.02 (br.s, 1H), 7.70 – 7.60 (m, 3H), 6.85 (d,  $J$  = 9.0 Hz, 2H), 3.72 (s, 3H), 3.66 (br.s, 2H), 3.54 (t,  $J$  = 5.7 Hz, 2H), 3.29 (s, 3H). Purine NH not observed.

**$^{13}\text{C}$  NMR (101 MHz,  $\text{DMSO}-d_6$ )**  $\delta$  154.1 (C), 153.3 (C), 120.9 (CH), 113.7 (CH), 70.4 ( $\text{CH}_2$ ), 58.0 ( $\text{CH}_3$ ), 55.2 ( $\text{CH}_3$ ). Four quaternary carbons, one aromatic CH and one aliphatic  $\text{CH}_2$  not observed.

**HPLC:**  $t_R$  = 3.88 min, > 96% purity (214 and 254 nm).

**HRMS:** (ESI+) calc.  $m/z$  for  $[\text{C}_{15}\text{H}_{18}\text{N}_6\text{O}_2 + \text{H}]^+$  315.1564, found 315.1572.

**6-Morpholino-*N*-(3-(trifluoromethyl)benzyl)-9*H*-purin-2-amine (41)**

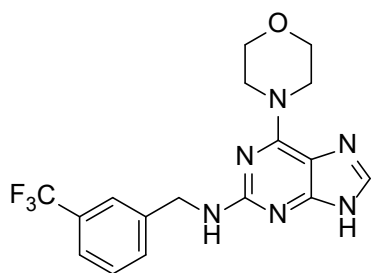

**General procedure IV from 5a** – The concentrated residue was purified by column chromatography (1% 7 N NH<sub>3</sub> in methanol, 2% methanol and 97% dichloromethane) to give the title compound as an off-white powder (52 mg, 90% yield).

**TLC:** *R<sub>f</sub>* = 0.28 (1% 7 N NH<sub>3</sub> in methanol, 2% methanol and 97% dichloromethane).

**<sup>1</sup>H NMR (401 MHz, DMSO-*d*<sub>6</sub>)**  $\delta$  12.29 (s, 1H), 7.69 (s, 1H), 7.66 (br.s, 1H), 7.62 (d, *J* = 7.1 Hz, 1H), 7.56 – 7.49 (m, 2H), 7.03 (t, *J* = 6.3 Hz, 1H), 4.51 (d, *J* = 6.3 Hz, 2H), 4.08 (br.s, 4H), 3.64 (t, *J* = 4.8 Hz, 4H).

**<sup>13</sup>C NMR (101 MHz, DMSO-*d*<sub>6</sub>)**  $\delta$  158.5 (C), 153.8 (C), 153.4 (C), 143.1 (C), 135.1 (CH), 131.1 (CH), 129.1 (CH), 128.9 (C), 128.6 (C), 123.5 (CH, *d*, *J* = 3.9 Hz), 123.0 (CH, *d*, *J* = 3.7 Hz), 113.4 (C), 66.2 (CH<sub>2</sub>), 44.9 (CH<sub>2</sub>), 44.2 (CH<sub>2</sub>).

**HPLC:** *t<sub>R</sub>* = 4.63 min, > 98% purity (214 and 254 nm).

**HRMS:** (ESI+) calc. *m/z* for [C<sub>17</sub>H<sub>17</sub>F<sub>3</sub>N<sub>6</sub>O + H]<sup>+</sup> 379.1489, found 379.1499.

***N*<sup>6</sup>-(Tetrahydro-2*H*-pyran-4-yl)-*N*<sup>2</sup>-(3-(trifluoromethyl)benzyl)-9*H*-purine-2,6-diamine (42)**

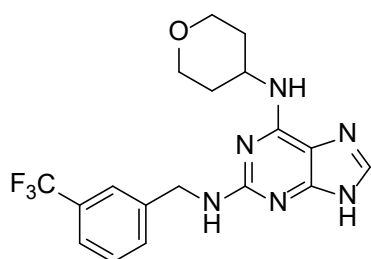

**General procedure IV from 5a** – The concentrated residue was purified by column chromatography (1% 7 N NH<sub>3</sub> in methanol, 2% methanol and 97% dichloromethane) to give the title compound as a yellow powder (45 mg, 75% yield).

**TLC:** *R<sub>f</sub>* = 0.27 (1% 7 N NH<sub>3</sub> in methanol, 2% methanol and 97% dichloromethane).

**<sup>1</sup>H NMR (401 MHz, DMSO-*d*<sub>6</sub>)**  $\delta$  12.15 (br.s, 1H), 7.64 – 7.60 (m, 3H), 7.54 – 7.49 (m, 2H), 7.04 – 6.95 (m, 2H), 4.51 (d, *J* = 6.3 Hz, 2H), 4.11 – 4.09 (m, 1H), 3.83 (d, *J* = 11.5 Hz, 2H), 3.30 – 3.27 (m, 2H), 1.69 – 1.54 (m, 4H).

**<sup>13</sup>C NMR (101 MHz, DMSO-*d*<sub>6</sub>)**  $\delta$  159.1 (C), 143.4 (C), 135.2 (CH), 131.0 (CH), 129.0 (CH), 128.8 (C, *q*, *J* = 31.3 Hz), 125.8 (C), 123.2 (CH, *d*, *J* = 3.9 Hz), 123.1 (C), 122.9 (CH, *d*, *J* = 3.9 Hz), 66.4 (CH<sub>2</sub>), 44.3 (CH<sub>2</sub>), 32.6 (CH<sub>2</sub>). Two quaternary carbons and one aliphatic CH not observed.

**HPLC:** *t<sub>R</sub>* = 4.59 min, > 98% purity (214 and 254 nm).

**HRMS:** (ESI+) calc. *m/z* for [C<sub>18</sub>H<sub>19</sub>F<sub>3</sub>N<sub>6</sub>O + H]<sup>+</sup> 393.1645, found 393.1654.

***N*<sup>6</sup>-(Pyridin-3-ylmethyl)-*N*<sup>2</sup>-(3-(trifluoromethyl)benzyl)-9*H*-purine-2,6-diamine (43) [35]**

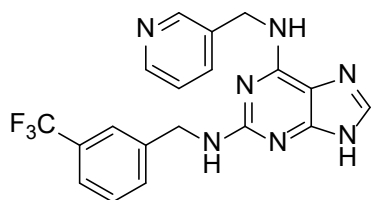

**General procedure IV from 5a** – The concentrated residue was purified by column chromatography (1% 7 N NH<sub>3</sub> in methanol, 4% methanol and 95% dichloromethane) to give the title compound as a white powder (28 mg, 46% yield).

**TLC:** *R<sub>f</sub>* = 0.41 (1% 7 N NH<sub>3</sub> in methanol, 4% methanol and 95% dichloromethane).

**<sup>1</sup>H NMR (401 MHz, DMSO-*d*<sub>6</sub>)**  $\delta$  8.54 (s, 1H), 8.40 (dd, *J* = 4.8, 1.7 Hz, 1H), 7.85 (br.s, 1H), 7.67 – 7.46 (m, 7H), 7.24 (br. t, *J* = 6.4 Hz, 1H), 6.99 (br.s, 1H), 4.59 – 4.50 (m, 4H).

**<sup>13</sup>C NMR (101 MHz, DMSO-*d*<sub>6</sub>)**  $\delta$  159.1 (C), 149.0 (CH), 147.8 (CH), 143.2 (C), 135.2 (CH), 131.1 (CH), 129.1 (CH), 129.0 (C), 123.3 (CH), 123.3 (d, *J* = 3.9 Hz, CH), 123.0 (d, *J* = 3.5 Hz, CH), 44.1 (CH<sub>2</sub>). Four quaternary carbons, one aromatic CH and one aliphatic CH<sub>2</sub> not observed.

**HPLC:** *t<sub>R</sub>* = 3.76 min, > 97% purity (214 and 254 nm).

**HRMS:** (ESI+) calc. *m/z* for [C<sub>19</sub>H<sub>16</sub>F<sub>3</sub>N<sub>7</sub> + H]<sup>+</sup> 400.1492, found: 400.1502.

***N*<sup>6</sup>-(4-Methoxybenzyl)-*N*<sup>2</sup>-(3-(trifluoromethyl)benzyl)-9*H*-purine-2,6-diamine (44)**

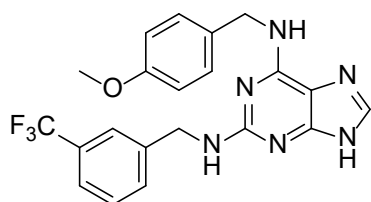



**General procedure IV from 5a** – The concentrated residue was added cold dichloromethane. The precipitate was collected and was then washed with 0.5 M HCl followed by 30% ammonia solution. The title compound was collected as a beige powder (63 mg, 97% yield).

**TLC:**  $R_f$  = 0.43 (1% 7 N  $\text{NH}_3$  in methanol, 5% methanol and 94% dichloromethane).

**$^1\text{H}$  NMR (401 MHz,  $\text{DMSO}-d_6$ )**  $\delta$  12.14 (br.s, 1H), 7.64 (s, 2H), 7.59 – 7.47 (m, 4H), 7.21 (d,  $J$  = 8.2 Hz, 2H), 6.95 (s, 1H), 6.77 (d,  $J$  = 8.1 Hz, 2H), 4.53 (d,  $J$  = 6.4 Hz, 4H), 3.69 (s, 3H).

**$^{13}\text{C}$  NMR (101 MHz,  $\text{DMSO}-d_6$ )**  $\delta$  159.2 (C), 158.0 (C), 143.3 (C), 135.4 (CH), 132.6 (C), 131.2 (CH), 129.1 (CH), 129.0 (C), 128.8 (CH), 125.8 (C), 123.4 (d,  $J$  = 3.5 Hz, CH), 123.1 (C), 123.0 (d,  $J$  = 3.9 Hz, CH), 113.5 (CH), 55.0 (CH<sub>3</sub>), 44.2 (CH<sub>2</sub>). Two quaternary carbons not observed.

**HPLC:**  $t_R$  = 5.33 min, > 95% purity (214 and 254 nm).

**HRMS:** (ESI+) calc.  $m/z$  for  $[\text{C}_{21}\text{H}_{19}\text{F}_3\text{N}_6\text{O} + \text{H}]^+$  429.1645, found: 429.1645.

**$N^6$ -Benzyl-9-isopropyl- $N^2$ -(3-(trifluoromethyl)benzyl)-9H-purine-2,6-diamine (45)**

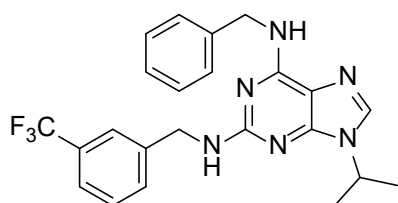

To a solution of  $N^6$ -benzyl- $N^2$ -(3-(trifluoromethyl)benzyl)-9H-purine-2,6-diamine (**9**, 30 mg, 75  $\mu\text{mol}$ ) in dimethyl sulfoxide (3 mL), was added 2-bromopropane (23 mg, 18  $\mu\text{L}$ , 188  $\mu\text{mol}$ ) and potassium carbonate (31 mg, 226  $\mu\text{mol}$ ). The reaction was heated to 80  $^\circ\text{C}$  and stirred overnight (16 hours). To the mixture was added water (5 mL) and the precipitate that formed was collected. The title compound was a white powder (28 mg, 85% yield).

**TLC:**  $R_f$  = 0.55 (5% methanol in dichloromethane).

**$^1\text{H}$  NMR (401 MHz,  $\text{DMSO}-d_6$ )**  $\delta$  7.78 – 7.78 (m, 2H), 7.68 (s, 1H), 7.59 (d,  $J$  = 7.3 Hz, 1H), 7.53 (d,  $J$  = 7.6 Hz, 1H), 7.47 (t,  $J$  = 7.7 Hz, 1H), 7.26 – 7.15 (m, 5H), 7.09 – 7.06 (m, 1H), 4.57 – 4.47 (m, 5H), 1.42 (d,  $J$  = 6.8 Hz, 6H).

**$^{13}\text{C}$  NMR (101 MHz,  $\text{DMSO}-d_6$ )**  $\delta$  158.7 (C), 143.2 (C), 140.6 (C), 135.3 (CH), 131.5 (CH), 128.9 (CH), 128.5 (C), 128.0 (CH), 127.3 (CH), 126.4 (CH), 123.0 (CH), 45.8 (CH), 44.3 (CH<sub>2</sub>), 21.9 (CH<sub>3</sub>). Four quaternary carbons and one aromatic CH not observed.

**HPLC:**  $t_R$  = 5.90 min, > 95% purity (214 and 254 nm).

**HRMS:** (ESI+) calc. m/z for [C<sub>23</sub>H<sub>23</sub>F<sub>3</sub>N<sub>6</sub> + H]<sup>+</sup> 441.2009, found 441.2021.

***N*<sup>2</sup>-(3-Bromobenzyl)-*N*<sup>6</sup>-(2-methoxyethyl)-9-methyl-9*H*-purine-2,6-diamine (46)**

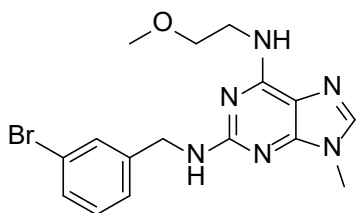

To a solution of *N*<sup>2</sup>-(3-bromobenzyl)-*N*<sup>6</sup>-(2-methoxyethyl)-9*H*-purine-2,6-diamine (**31**, 30 mg, 80 μmol) in anhydrous *N,N*-dimethylformamide (3 mL), was added iodomethane (12 mg, 5.5 μL, 87 μmol) and potassium carbonate (12 mg, 87 μmol). The reaction was stirred at room temperature for 8 hours. To the mixture was added water (15 mL) and extracted with ethyl acetate (3 x 15 mL). The organic extracts were combined, washed with water (50 mL) and brine (50 mL), dried over MgSO<sub>4</sub> and concentrated *in vacuo*. The residue was purified by column chromatography (3% methanol in dichloromethane) to give the title compound as a white powder (21 mg, 68% yield).

**TLC:** *R*<sub>f</sub> = 0.30 (3% methanol in dichloromethane).

**<sup>1</sup>H NMR (401 MHz, DMSO-*d*<sub>6</sub>)** δ 7.66 (s, 1H), 7.52 (s, 1H), 7.38 – 7.32 (m, 2H), 7.24 (t, *J* = 7.7 Hz, 1H), 7.11 – 7.05 (m, 2H), 4.44 (d, *J* = 6.4 Hz, 2H), 3.54 – 3.51 (m, 5H), 3.40 – 3.38 (m, 2H), 3.20 (s, 3H).

**<sup>13</sup>C NMR (101 MHz, DMSO-*d*<sub>6</sub>)** δ 159.0 (C), 154.5 (C), 144.7 (C), 137.9 (CH), 130.2 (CH), 130.0 (CH), 129.0 (CH), 126.3 (CH), 121.4 (C), 70.5 (CH<sub>2</sub>), 57.8 (CH<sub>3</sub>), 44.1 (CH<sub>2</sub>), 28.9 (CH<sub>3</sub>).

**HPLC:** *t*<sub>R</sub> = 4.64 min, > 95% purity (214 and 254 nm).

**HRMS:** (ESI+) calc. m/z for [C<sub>16</sub>H<sub>19</sub><sup>79</sup>BrN<sub>6</sub>O + H]<sup>+</sup> 391.0876, found 391.0887.

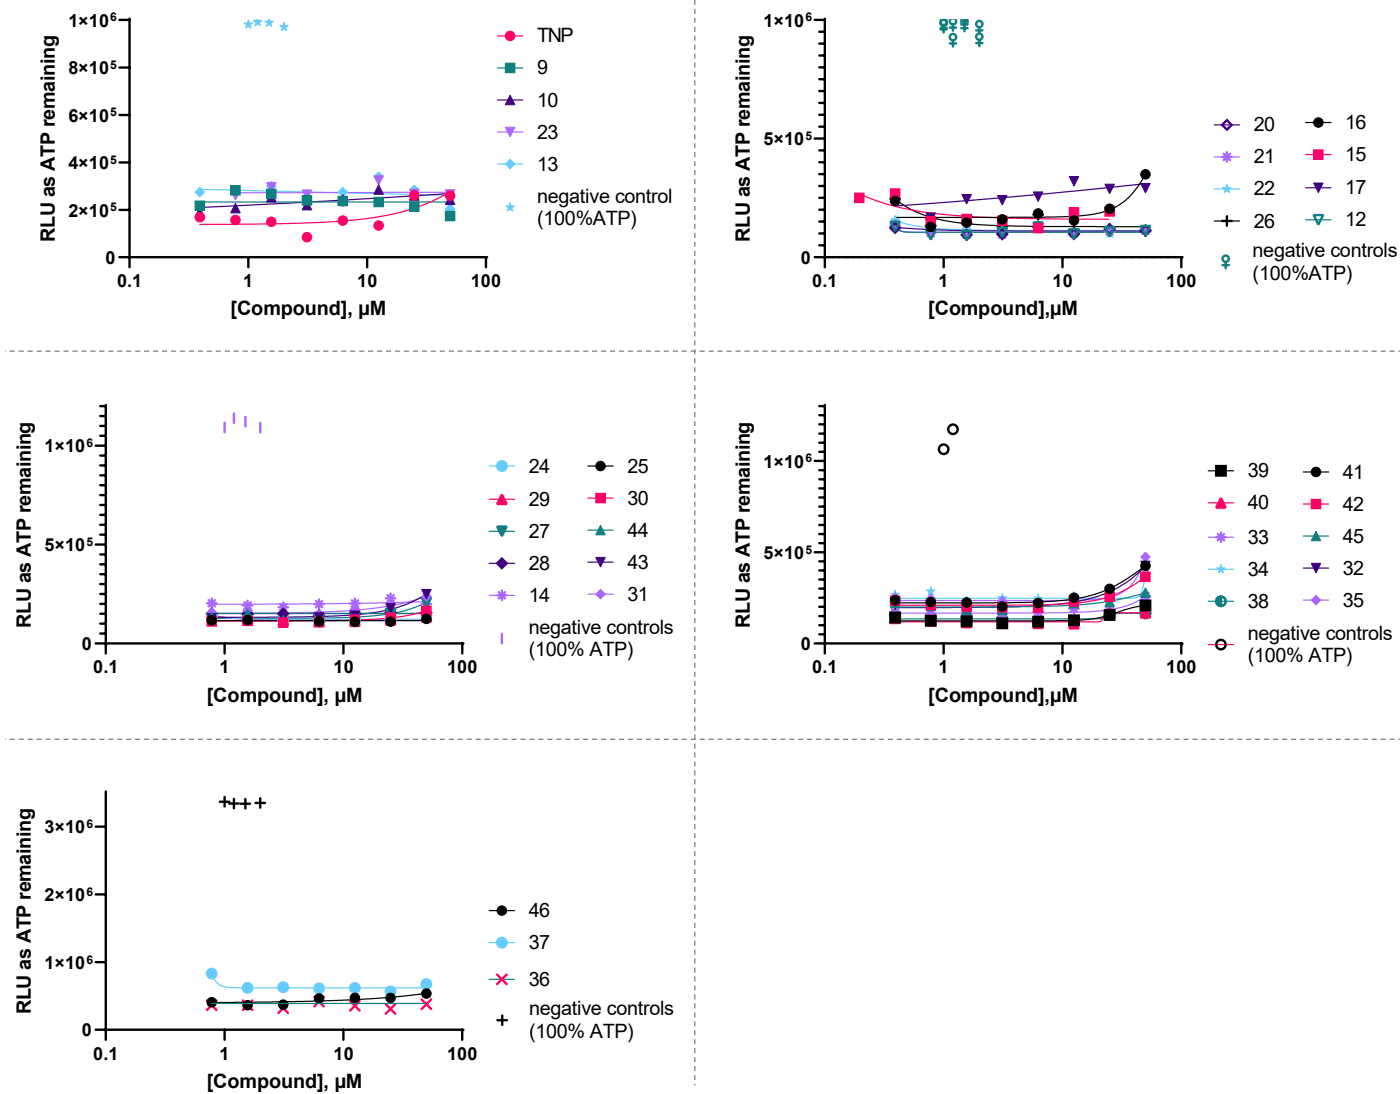

**Figure S1. TNP and its analogues do not inhibit *CaIpk2* at concentrations up to 50  $\mu\text{M}$ .** The  $\text{IC}_{50}$  for 11, 18 and 19 were not determined due to poor solubility.  $\text{IC}_{50}$  values were obtained using the enzyme assay method outlined in section 2.6.

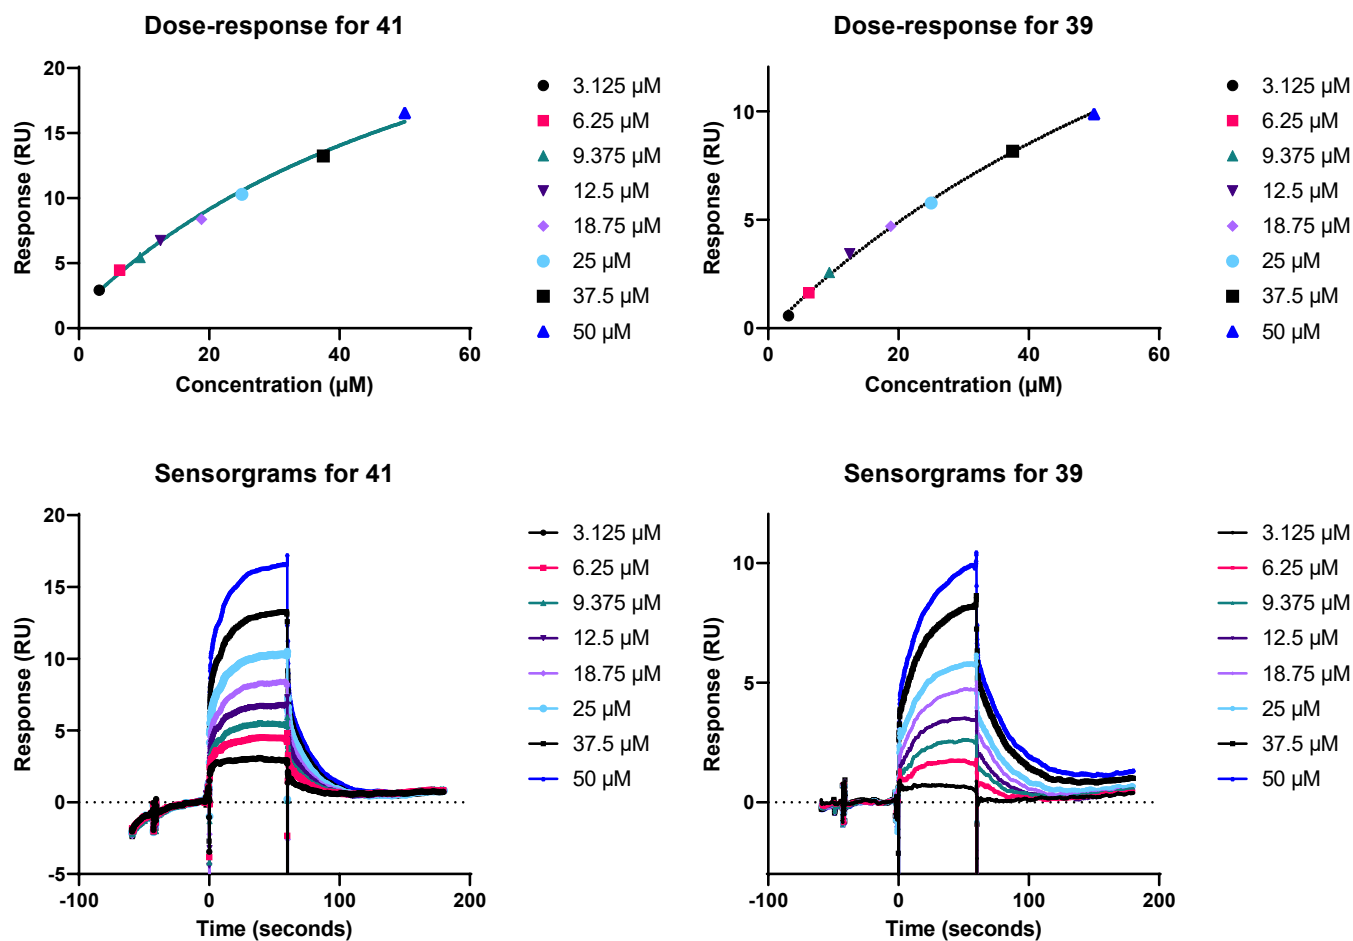

**Figure S2.** Surface plasmon resonance (SPR) sensorgrams and dose-response curves of compounds **39** and **41** are shown as representative data. The  $K_D$  values in **Table 7** were obtained using steady-state affinity.
